# Supplementary material for: Microscopic insights into water adsorption in carbon nanopores – the role of acidic and basic functional groups and their configurations
Source: Royal Society of Chemistry journal article supplement (doi:10.1039/d1cp02308j), 2021-01-01
Supplement: d1cp02308j1.pdf [file d1cp02308j1.pdf]

## Supporting Information

### Microscopic Insights into Water Adsorption in Carbon Nanopore – The Role of Acidic and Basic Functional Groups and their Configurations

Lumeng Liu<sup>1,4,5,\*</sup>, Wenmao Zeng<sup>1,4,5</sup>, Shiliang (Johnathan) Tan<sup>3</sup>, Meng Liu<sup>1,4,5</sup>, and D. D. Do<sup>2,\*</sup>

1. School of Civil Engineering, Chongqing University, Chongqing 400045, China

2. School of Chemical Engineering, University of Queensland, St. Lucia, QLD 4072, Australia

3. School of Chemical and Biomedical Engineering, Nanyang Technological University, Singapore 637459,  
Singapore

4. Joint International Research Laboratory of Green Buildings and Built Environments (Ministry of Education),  
Chongqing University, Chongqing 400045, China

5. National Centre for International Research of Low-carbon and Green Buildings (Ministry of Science and  
Technology), Chongqing University, Chongqing 400045, China

#### *2D density distribution and 2D compressibility distribution*

For 2D density distribution with respect to  $xz$  plane (side view), the volume of the pore is divided into bins in the  $x$ - and  $z$ -directions, and the 2D-density of the bin located at  $(x, z)$  is

calculated as  $\rho(z, x) = \frac{\langle \Delta N(z, x) \rangle}{L_y \Delta z \Delta x}$ , where  $\Delta N(z, x)$  is the number of molecules whose centres

of mass are in this bin bounded by  $[z, z + \Delta z]$  and  $[x, x + \Delta x]$ ;  $L_y$  is the length of the pore in the  $y$ -direction. Likewise, for 2D density distribution with respect to  $xy$  plane (top view), the

volume of the pore is divided into bins in the  $x$ - and  $y$ -directions, and the 2D-density of the bin

located at  $(x, y)$  is calculated as  $\rho(x, y) = \frac{\langle \Delta N(x, y) \rangle}{L_z \Delta x \Delta y}$ , where  $\Delta N(x, y)$  is the number of

molecules whose centres of mass are in this bin bounded by  $[y, y + \Delta y]$  and  $[x, x + \Delta x]$ ;  $L_z$  is the length of the pore in the  $z$ -direction. Note that  $L_z$  is different for the micropore and mesopore

sections. The bin dimensions  $\Delta x$ ,  $\Delta y$  and  $\Delta z$  are a fraction of the collision diameter of oxygen atom, and in our work we chose  $\Delta x = \Delta y = \Delta z = 0.1 \sigma_O$ .

Compressibility is defined as the negative of the relative volume change with respect to pressure at constant temperature. In GCMC, local compressibility can be expressed in terms of the corresponding particle number fluctuation  $F_k$ , as

$$\kappa = -\frac{1}{V} \frac{\partial V}{\partial \rho} = \frac{1}{kT \langle \rho_k \rangle} \frac{f(N_k, N_k)}{\langle N_k \rangle} = \frac{F_k}{kT \langle \rho_k \rangle}$$

where  $\rho_k$  is the density of bin  $k$ , and  $F_k$  is the local fluctuation of number of molecules.

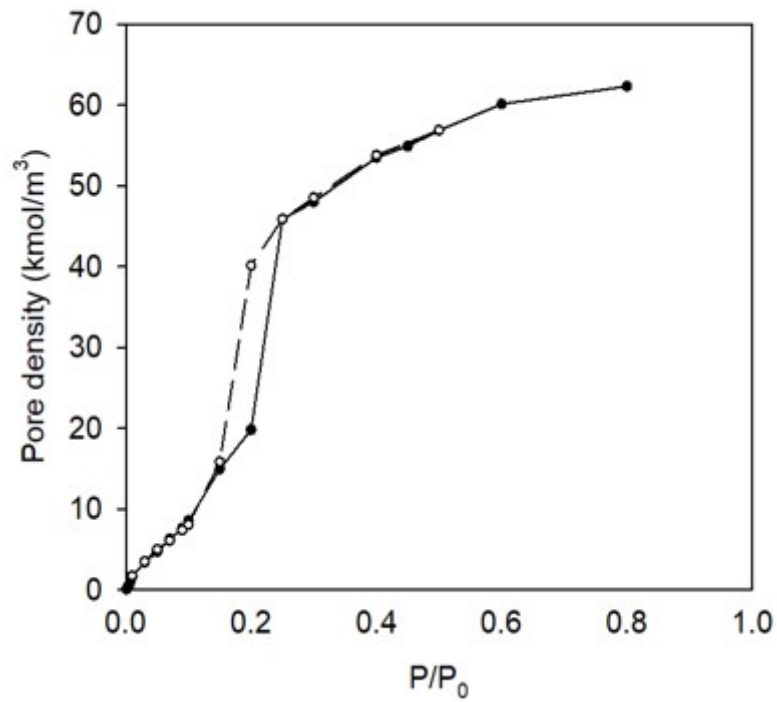

**Figure S1.** Simulated isotherms for water adsorption at 298 K in a 1.6 nm pore with 14 rows of FGs located at  $A-G$  and  $A'-G'$ . Dashed lines: desorption.

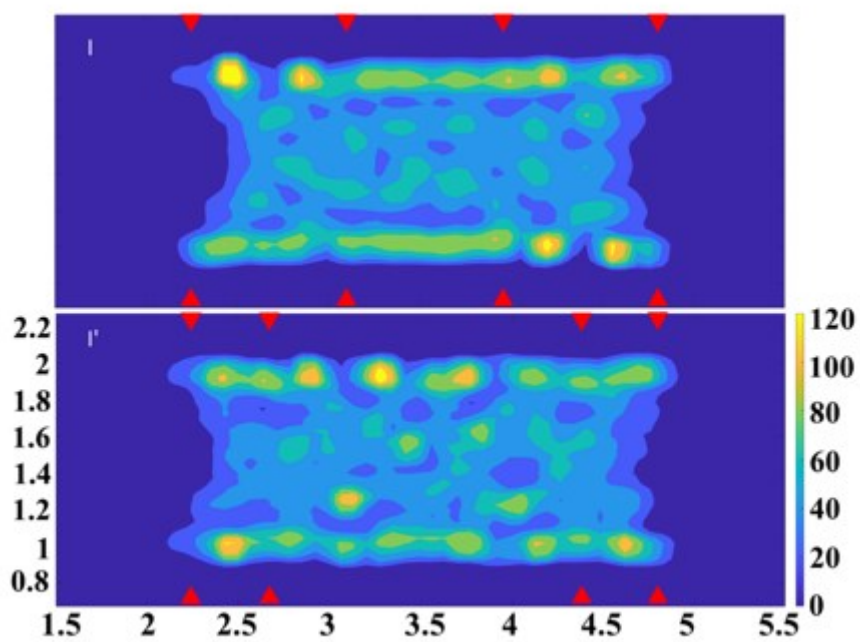

**Figure S2.** 2D density distributions of  $s$  for selected points marked in the water isotherm at 298 K in Figure 5. Red triangles are indicative of the positions of FGs in x-direction.

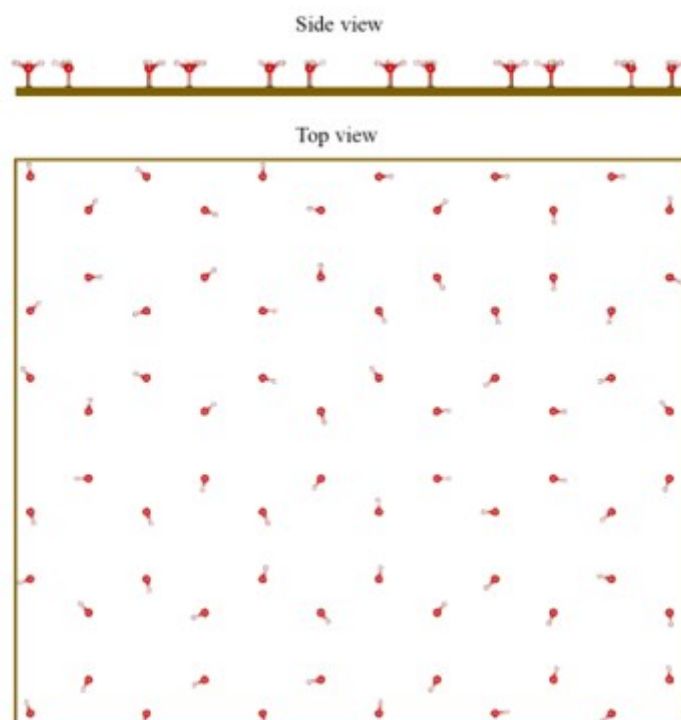

**Figure S3.** Configurations of FGs on a graphitic surface.

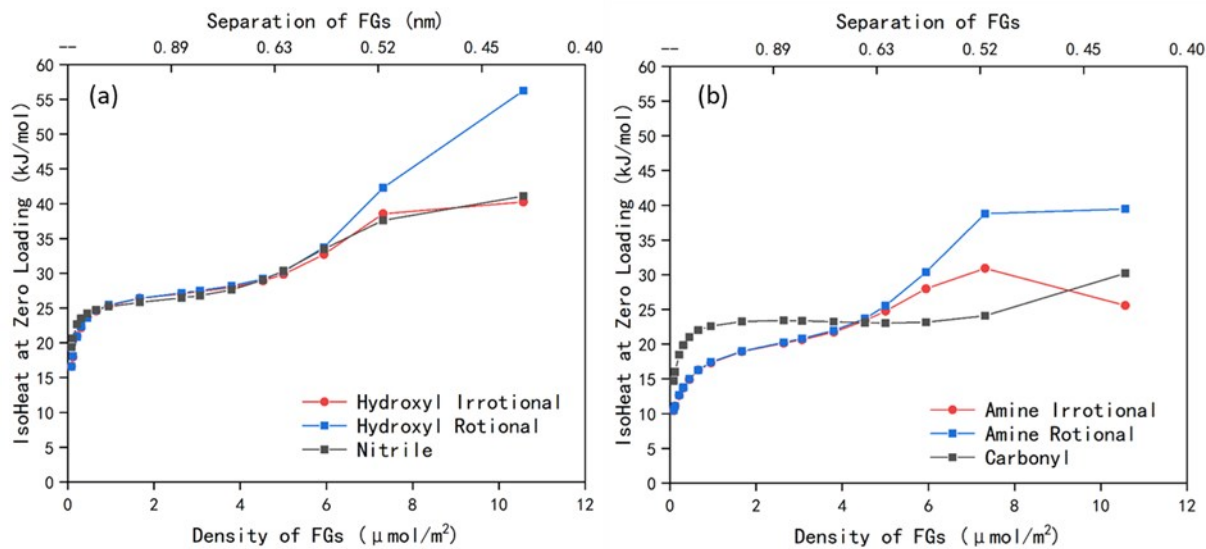

**Figure S4.** Isosteric heat at zero loading between water and multiple FGs. All FGs were embedded on an infinite graphite surface (modelled with 10-4-3 equation). (a) Hydroxyl and Nitrile groups and (b) amine and carbonyl groups.

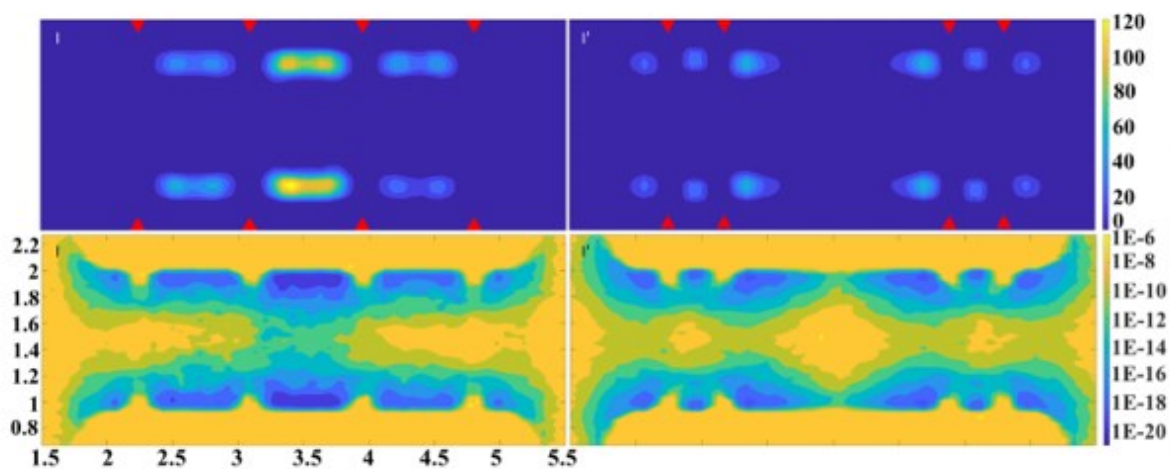

**Figure S5.** 2D density (top) and compressibility (bottom) distributions for selected points marked in the water isotherm at 298 K in Figure 8b for nitrile group. Red triangles are indicative of the positions of FGs in x-direction.

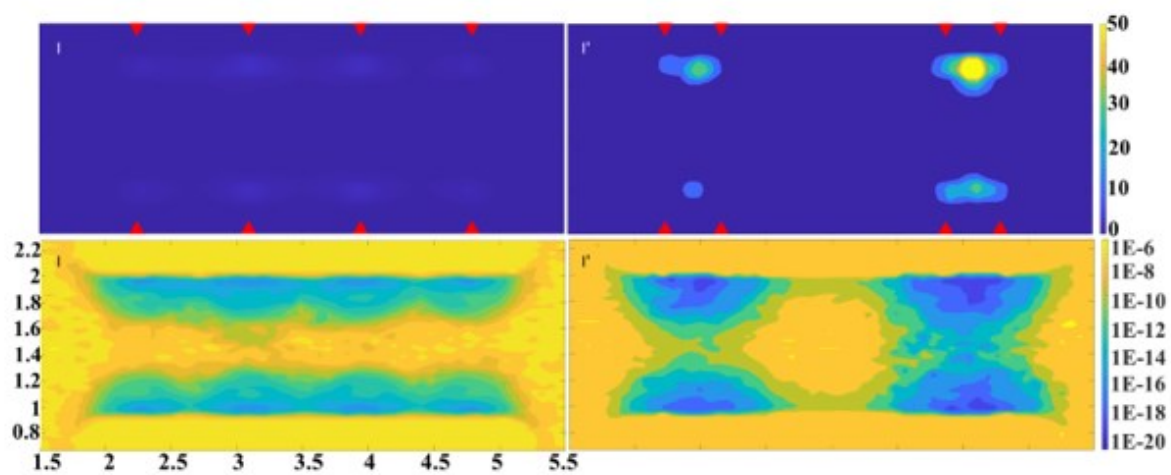

**Figure S6.** 2D density (top) and compressibility (bottom) distributions for selected points marked in the water isotherm at 298 K in Figure 8c for amine group. Red triangles are indicative of the positions of FGs in x-direction.
